# Supplementary material for: Early Succession Patterns of Benthic Assemblages on Artificial Reefs in the Oligotrophic Eastern Mediterranean Basin
Source: MDPI journal article supplement (doi:10.3390/jmse10050620), 2022-05-02
Supplement: s1 [file s1]

**Table S1.** Mean coverage percentage  $\pm$  standard deviation of sessile taxa on artificial reefs per year.

| <b>Taxonomic Group/Species</b>                                   | <b>2017</b>       | <b>2019</b>       | <b>2020</b>       |
|------------------------------------------------------------------|-------------------|-------------------|-------------------|
| <b>Macroalgae</b>                                                | 0.830 $\pm$ 0.425 | 0.868 $\pm$ 0.342 | 0.863 $\pm$ 0.243 |
| <i>Acetabularia</i> sp.                                          | 0.006 $\pm$ 0.007 | 0.000 $\pm$ 0.002 | 0                 |
| <i>Anadyomene stellata</i> (Wulfen) C.Agardh                     | 0.001 $\pm$ 0.002 | 0.001 $\pm$ 0.003 | 0.016 $\pm$ 0.049 |
| <i>Caulerpa prolifera</i> (Forsskål) J.V.Lamouroux               | 0                 | 0.001 $\pm$ 0.004 | 0.015 $\pm$ 0.035 |
| <i>Codium</i> sp.                                                | 0                 | 0.001 $\pm$ 0.004 | 0.002 $\pm$ 0.007 |
| <i>Dictyopteris</i> sp.                                          | 0.001 $\pm$ 0.003 | 0.002 $\pm$ 0.008 | 0                 |
| <i>Dictyota implexa</i> (Desfontaines) J.V.Lamouroux             | 0.133 $\pm$ 0.249 | 0                 | 0                 |
| <i>Dictyota</i> sp.                                              | 0                 | 0.000 $\pm$ 0.002 | 0.001 $\pm$ 0.005 |
| Encrusting macroalgae                                            | 0.036 $\pm$ 0.060 | 0.055 $\pm$ 0.067 | 0.077 $\pm$ 0.088 |
| Mucilaginous algae                                               | 0.278 $\pm$ 0.282 | 0                 | 0                 |
| <i>Padina pavonica</i> (Linnaeus) Thivy                          | 0.001 $\pm$ 0.003 | 0.002 $\pm$ 0.005 | 0.001 $\pm$ 0.003 |
| <i>Stypopodium schimperi</i> (Kützinger) Verlaque & Boudouresque | 0.004 $\pm$ 0.009 | 0.000 $\pm$ 0.002 | 0.013 $\pm$ 0.029 |
| Turf-forming algae                                               | 0.370 $\pm$ 0.269 | 0.806 $\pm$ 0.332 | 0.737 $\pm$ 0.226 |
| <b>Porifera</b>                                                  | 0                 | 0.016 $\pm$ 0.030 | 0.021 $\pm$ 0.031 |
| <i>Aplysina aerophoba</i> (Nardo, 1833)                          | 0                 | 0.000 $\pm$ 0.002 | 0                 |
| <i>Chondrilla nucula</i> Schmidt, 1862                           | 0                 | 0                 | 0.001 $\pm$ 0.004 |
| <i>Cliona</i> sp.                                                | 0                 | 0.002 $\pm$ 0.006 | 0                 |
| <i>Fasciospongia cavernosa</i> (Schmidt, 1862)                   | 0                 | 0.003 $\pm$ 0.009 | 0.008 $\pm$ 0.015 |
| <i>Ircinia</i> sp.                                               | 0                 | 0                 | 0.004 $\pm$ 0.018 |
| <i>Phorbas tenacior</i> (Topsent, 1925)                          | 0                 | 0                 | 0.000 $\pm$ 0.002 |
| Red Encrusting Porifera                                          | 0                 | 0.002 $\pm$ 0.012 | 0.005 $\pm$ 0.021 |
| Other Porifera                                                   | 0                 | 0.009 $\pm$ 0.027 | 0.002 $\pm$ 0.005 |
| <b>Cnidaria</b>                                                  | 0.017 $\pm$ 0.053 | 0.065 $\pm$ 0.059 | 0.067 $\pm$ 0.051 |
| Hydrozoa                                                         | 0.017 $\pm$ 0.053 | 0.065 $\pm$ 0.059 | 0.067 $\pm$ 0.051 |
| <b>Polychaeta</b>                                                | 0.077 $\pm$ 0.087 | 0.023 $\pm$ 0.019 | 0.017 $\pm$ 0.008 |
| <i>Protula</i> spp.                                              | 0.009 $\pm$ 0.022 | 0.002 $\pm$ 0.005 | 0.007 $\pm$ 0.006 |
| <i>Sabella</i> spp.                                              | 0.001 $\pm$ 0.003 | 0                 | 0                 |
| Other Serpulidae                                                 | 0.068 $\pm$ 0.074 | 0.022 $\pm$ 0.018 | 0.011 $\pm$ 0.006 |
| <b>Mollusca</b>                                                  | 0                 | 0.003 $\pm$ 0.008 | 0.006 $\pm$ 0.013 |
| <i>Dendostrea</i> cf. <i>folium</i> (Linnaeus, 1758)             | 0                 | 0                 | 0.001 $\pm$ 0.004 |
| Ostreidae spp.                                                   | 0                 | 0.001 $\pm$ 0.004 | 0                 |
| <i>Pinctada radiata</i> (Leach, 1814)                            | 0                 | 0.000 $\pm$ 0.002 | 0                 |
| <i>Rocellaria dubia</i> (Pennant, 1777)                          | 0                 | 0.002 $\pm$ 0.005 | 0.001 $\pm$ 0.002 |
| <i>Chama</i> sp.                                                 | 0                 | 0                 | 0.001 $\pm$ 0.007 |
| <i>Thylacodes arenarius</i> (Linnaeus, 1758)                     | 0                 | 0.000 $\pm$ 0.002 | 0.001 $\pm$ 0.004 |
| <b>Bryozoa</b>                                                   | 0.069 $\pm$ 0.199 | 0.019 $\pm$ 0.052 | 0.018 $\pm$ 0.078 |
| <i>Calpensia</i> sp.                                             | 0.060 $\pm$ 0.199 | 0.018 $\pm$ 0.051 | 0.018 $\pm$ 0.078 |
| Encrusting Bryozoa                                               | 0.007 $\pm$ 0.024 | 0.000 $\pm$ 0.002 | 0                 |
| <i>Reteporella</i> sp.                                           | 0.001 $\pm$ 0.002 | 0.001 $\pm$ 0.003 | 0.001 $\pm$ 0.002 |
| <b>Tunicata</b>                                                  | 0.007 $\pm$ 0.018 | 0.005 $\pm$ 0.016 | 0.007 $\pm$ 0.016 |
| Colonial Tunicata                                                | 0.003 $\pm$ 0.013 | 0.005 $\pm$ 0.016 | 0.006 $\pm$ 0.014 |
| <i>Didemnum</i> sp.                                              | 0.004 $\pm$ 0.013 | 0                 | 0.000 $\pm$ 0.002 |
| <i>Halocynthia papillosa</i> (Linnaeus, 1767)                    | 0                 | 0                 | 0.001 $\pm$ 0.004 |
| Solitary Tunicata                                                | 0                 | 0.001 $\pm$ 0.003 | 0.001 $\pm$ 0.002 |
| <b>UBS</b>                                                       | 0.197 $\pm$ 0.215 | 0.476 $\pm$ 0.203 | 0.436 $\pm$ 0.147 |

**Table S2.** Mean abundance percentage  $\pm$  standard deviation of motile invertebrates on artificial reefs per year.

| Taxonomic Group/Species                          | 2017              | 2019              | 2020              |
|--------------------------------------------------|-------------------|-------------------|-------------------|
| <b>Polychaeta</b>                                | 0.105 $\pm$ 0.105 | 0.177 $\pm$ 0.175 | 0.281 $\pm$ 0.429 |
| Aphroditidae                                     | 0                 | 0.005 $\pm$ 0.013 | 0                 |
| Capitellidae                                     | 0.003 $\pm$ 0.004 | 0.009 $\pm$ 0.008 | 0.005 $\pm$ 0.013 |
| Chrysopetalidae                                  | 0.014 $\pm$ 0.013 | 0.027 $\pm$ 0.025 | 0.043 $\pm$ 0.064 |
| Dorvilleidae                                     | 0                 | 0.024 $\pm$ 0.031 | 0.011 $\pm$ 0.017 |
| Eunicidae                                        | 0.004 $\pm$ 0.003 | 0.002 $\pm$ 0.004 | 0.005 $\pm$ 0.013 |
| Glyceridae                                       | 0                 | 0                 | 0.005 $\pm$ 0.013 |
| Hesionidae                                       | 0.001 $\pm$ 0.002 | 0.007 $\pm$ 0.012 | 0                 |
| Lumbrineridae                                    | 0.001 $\pm$ 0.002 | 0                 | 0.005 $\pm$ 0.013 |
| Nereididae                                       | 0.014 $\pm$ 0.016 | 0.002 $\pm$ 0.004 | 0.049 $\pm$ 0.081 |
| Opheliidae                                       | 0                 | 0                 | 0.011 $\pm$ 0.017 |
| Paraonidae                                       | 0.018 $\pm$ 0.018 | 0                 | 0                 |
| Pholoinae                                        | 0.001 $\pm$ 0.002 | 0                 | 0.005 $\pm$ 0.013 |
| Phyllodocidae                                    | 0.002 $\pm$ 0.003 | 0                 | 0                 |
| Spionidae                                        | 0.008 $\pm$ 0.009 | 0.003 $\pm$ 0.005 | 0.005 $\pm$ 0.013 |
| Syllidae                                         | 0.041 $\pm$ 0.064 | 0.098 $\pm$ 0.133 | 0.135 $\pm$ 0.315 |
| <b>Sipuncula</b>                                 | 0                 | 0                 | 0.005 $\pm$ 0.012 |
| Sipunculidae                                     | 0                 | 0                 | 0.005 $\pm$ 0.012 |
| <b>Mollusca</b>                                  | 0.753 $\pm$ 0.419 | 0.787 $\pm$ 0.762 | 0.670 $\pm$ 0.486 |
| -Cardiidae                                       | 0.002 $\pm$ 0.004 | 0.005 $\pm$ 0.009 | 0                 |
| <i>Parvicardium pinnulatum</i> (Conrad, 1831)    | 0.002 $\pm$ 0.004 | 0                 | 0                 |
| <i>Parvicardium</i> sp.                          | 0                 | 0.005 $\pm$ 0.009 | 0                 |
| -Cerithiidae                                     | 0.665 $\pm$ 0.405 | 0.720 $\pm$ 0.738 | 0.649 $\pm$ 0.490 |
| <i>Bittium latreillii</i> (Payraudeau, 1826)     | 0.641 $\pm$ 0.403 | 0.691 $\pm$ 0.695 | 0.632 $\pm$ 0.504 |
| <i>Bittium reticulatum</i> (da Costa, 1778)      | 0                 | 0                 | 0.016 $\pm$ 0.025 |
| <i>Bittium</i> sp.                               | 0.019 $\pm$ 0.036 | 0.029 $\pm$ 0.046 | 0                 |
| <i>Cerithium</i> sp.                             | 0.006 $\pm$ 0.006 | 0                 | 0                 |
| -Cerithiopsidae                                  | 0.001 $\pm$ 0.002 | 0                 | 0                 |
| <i>Cerithiopsis</i> sp.                          | 0.001 $\pm$ 0.002 | 0                 | 0                 |
| -Conidae                                         | 0.005 $\pm$ 0.013 | 0.005 $\pm$ 0.009 | 0                 |
| <i>Conidae</i> sp.                               | 0                 | 0.002 $\pm$ 0.004 | 0                 |
| <i>Conus ventricosus</i> Gmelin, 1791            | 0.002 $\pm$ 0.004 | 0                 | 0                 |
| -Haminoeidae                                     | 0                 | 0.002 $\pm$ 0.004 | 0                 |
| <i>Haminoea</i> sp.                              | 0                 | 0.002 $\pm$ 0.004 | 0                 |
| -Mangeliidae                                     | 0.002 $\pm$ 0.004 | 0                 | 0                 |
| <i>Mangelia</i> sp.                              | 0.002 $\pm$ 0.004 | 0                 | 0                 |
| -Mitridae                                        | 0                 | 0.002 $\pm$ 0.004 | 0                 |
| <i>Episcomitra cornicula</i> (Linnaeus, 1758)    | 0                 | 0.002 $\pm$ 0.004 | 0                 |
| -Mitromorphidae                                  | 0                 | 0.002 $\pm$ 0.004 | 0.005 $\pm$ 0.012 |
| <i>Mitromorpha columbellaria</i> (Scacchi, 1836) | 0                 | 0                 | 0.005 $\pm$ 0.012 |
| <i>Mitromorpha</i> sp.                           | 0                 | 0.002 $\pm$ 0.004 | 0                 |
| -Muricidae                                       | 0.006 $\pm$ 0.010 | 0.003 $\pm$ 0.005 | 0.011 $\pm$ 0.015 |
| <i>Hexaplex trunculus</i> (Linnaeus, 1758)       | 0.003 $\pm$ 0.003 | 0                 | 0                 |
| <i>Murexsul aradasii</i> (Monterosato, 1883)     | 0                 | 0                 | 0.005 $\pm$ 0.012 |
| <i>Muricidae</i> sp.                             | 0                 | 0                 | 0.005 $\pm$ 0.012 |
| <i>Muricopsis cristata</i> (Brocchi, 1814)       | 0.004 $\pm$ 0.009 | 0.003 $\pm$ 0.005 | 0                 |
| -Mytilidae                                       | 0.002 $\pm$ 0.003 | 0.012 $\pm$ 0.029 | 0                 |
| <i>Musculus costulatus</i> (Risso, 1826)         | 0.002 $\pm$ 0.003 | 0.012 $\pm$ 0.029 | 0                 |
| -Noetiidae                                       | 0.001 $\pm$ 0.002 | 0                 | 0                 |

|                                              |               |               |               |
|----------------------------------------------|---------------|---------------|---------------|
| <i>Striarca lactea</i> (Linnaeus, 1758)      | 0.001 ± 0.002 | 0             | 0             |
| -Omalogyridae                                | 0             | 0.014 ± 0.021 | 0             |
| <i>Omalogyra atomus</i> (Philippi, 1841)     | 0             | 0.014 ± 0.021 | 0             |
| -Pectinidae                                  | 0.001 ± 0.002 | 0             | 0             |
| Pectinidae sp.                               | 0.001 ± 0.002 | 0             | 0             |
| -Phasianellidae                              | 0.006 ± 0.011 | 0.002 ± 0.004 | 0             |
| <i>Odostomia</i> sp.                         | 0             | 0.002 ± 0.004 | 0             |
| <i>Tricolia pullus</i> (Linnaeus, 1758)      | 0.004 ± 0.011 | 0             | 0             |
| -Raphitomidae                                | 0.001 ± 0.002 | 0             | 0             |
| <i>Raphitoma</i> sp.                         | 0.001 ± 0.002 | 0             | 0             |
| -Rissoidae                                   | 0.050 ± 0.062 | 0.024 ± 0.025 | 0             |
| <i>Alvania schwartziana</i> Brusina, 1866    | 0.007 ± 0.017 | 0.003 ± 0.005 | 0             |
| <i>Alvania</i> sp.                           | 0.001 ± 0.002 | 0             | 0             |
| <i>Pusillina marginata</i> (Michaud, 1830)   | 0.042 ± 0.066 | 0.021 ± 0.022 | 0             |
| -Semelidae                                   | 0.001 ± 0.002 | 0             | 0             |
| <i>Abra nitida</i> (O. F. Müller, 1776)      | 0.001 ± 0.002 | 0             | 0             |
| -Trochidae                                   | 0.015 ± 0.018 | 0             | 0.005 ± 0.012 |
| <i>Gibbula</i> sp.                           | 0.004 ± 0.009 | 0             | 0             |
| <i>Jujubinus exasperatus</i> (Pennant, 1777) | 0.009 ± 0.010 | 0             | 0             |
| <i>Jujubinus</i> sp.                         | 0.003 ± 0.007 | 0             | 0.005 ± 0.012 |
| -Veneridae                                   | 0.001 ± 0.002 | 0             | 0             |
| Veneridae sp.                                | 0.001 ± 0.002 | 0             | 0             |
| <b>Crustacea</b>                             | 0.142 ± 0.117 | 0.036 ± 0.027 | 0.043 ± 0.045 |
| -Amphipoda                                   | 0.116 ± 0.109 | 0.015 ± 0.013 | 0.011 ± 0.015 |
| Ampithoidae                                  | 0             | 0.002 ± 0.004 | 0.005 ± 0.012 |
| Aoridae                                      | 0.019 ± 0.018 | 0.007 ± 0.005 | 0             |
| Caprellidae                                  | 0.040 ± 0.043 | 0.002 ± 0.004 | 0             |
| Corophiidae                                  | 0.001 ± 0.002 | 0             | 0             |
| Dexaminidae                                  | 0.031 ± 0.027 | 0.003 ± 0.005 | 0             |
| Lysianassidae                                | 0.021 ± 0.026 | 0             | 0             |
| Maeridae                                     | 0             | 0             | 0.005 ± 0.012 |
| Nuuanuidae                                   | 0.003 ± 0.007 | 0             | 0             |
| Oedicerotidae                                | 0.001 ± 0.002 | 0             | 0             |
| Stenothoidae                                 | 0             | 0.002 ± 0.004 | 0             |
| -Cumacea                                     | 0.019 ± 0.026 | 0             | 0             |
| Bodotriidae                                  | 0.019 ± 0.026 | 0             | 0             |
| -Decapoda                                    | 0             | 0.005 ± 0.009 | 0.011 ± 0.024 |
| Paguridae                                    | 0             | 0             | 0.011 ± 0.024 |
| Portunidae                                   | 0             | 0.005 ± 0.009 | 0             |
| -Isopoda                                     | 0.004 ± 0.006 | 0             | 0             |
| Anthuridae                                   | 0.003 ± 0.007 | 0             | 0             |
| Janiridae                                    | 0.001 ± 0.002 | 0             | 0             |
| -Tanaidacea                                  | 0.003 ± 0.003 | 0.017 ± 0.024 | 0.022 ± 0.024 |
| Leptocheliidae                               | 0.003 ± 0.003 | 0.017 ± 0.024 | 0.022 ± 0.024 |

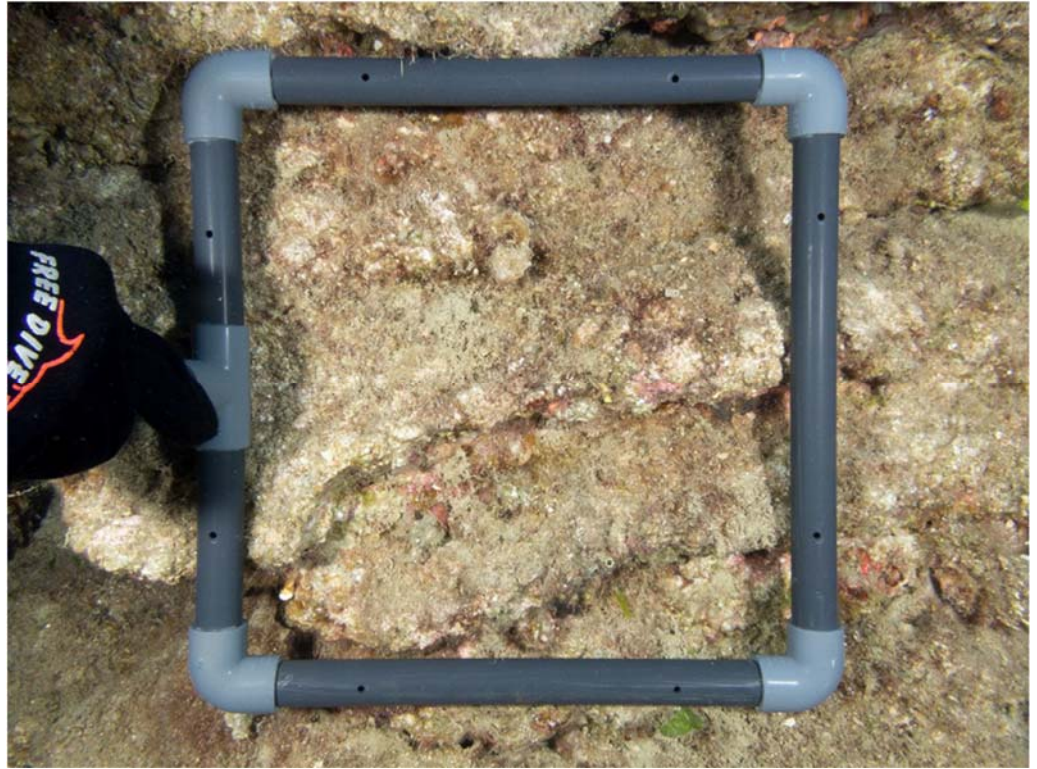

**Figure S1.** Photographed quadrat of 25 × 25 cm placed on the surface of an AR.

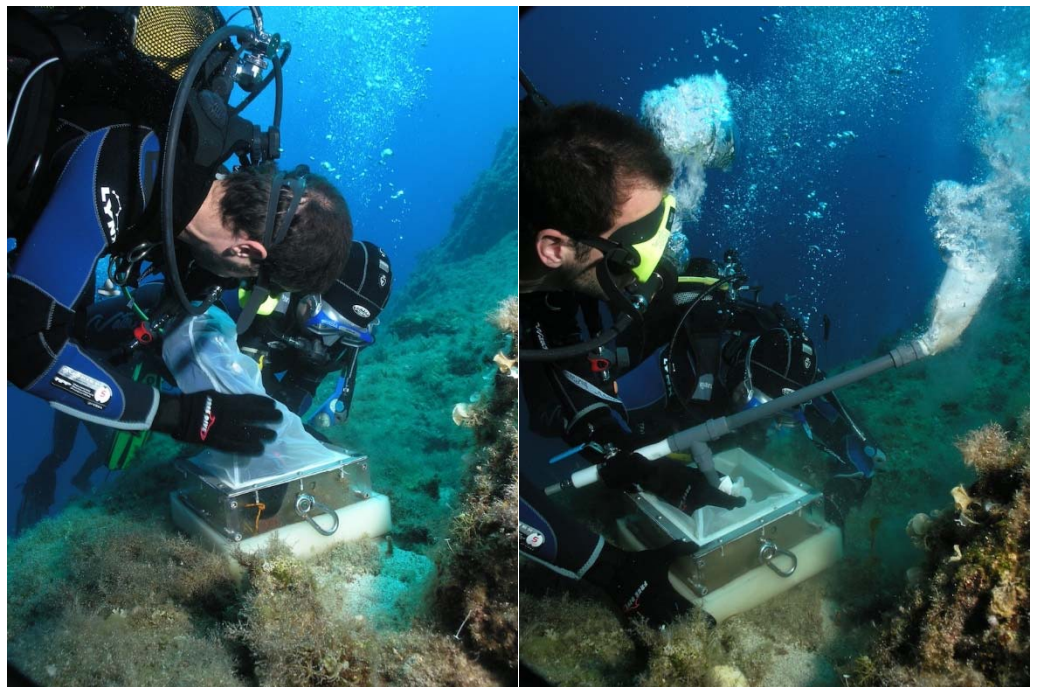

**Figure S2.** Sampling of the motile component of benthic assemblages. Artificial reef surfaces of 25 × 25 cm were exhaustively scraped using a padded quadrat (**left**), and the samples were collected using a MANOSS suction sampler (**right**).
